# Supplementary material
Source: publisher site journal article supplement (doi:10.3762/bjoc.2.13)
Supplement: Additional file 6 [file 1860-5397-2-13-S6.pdf]

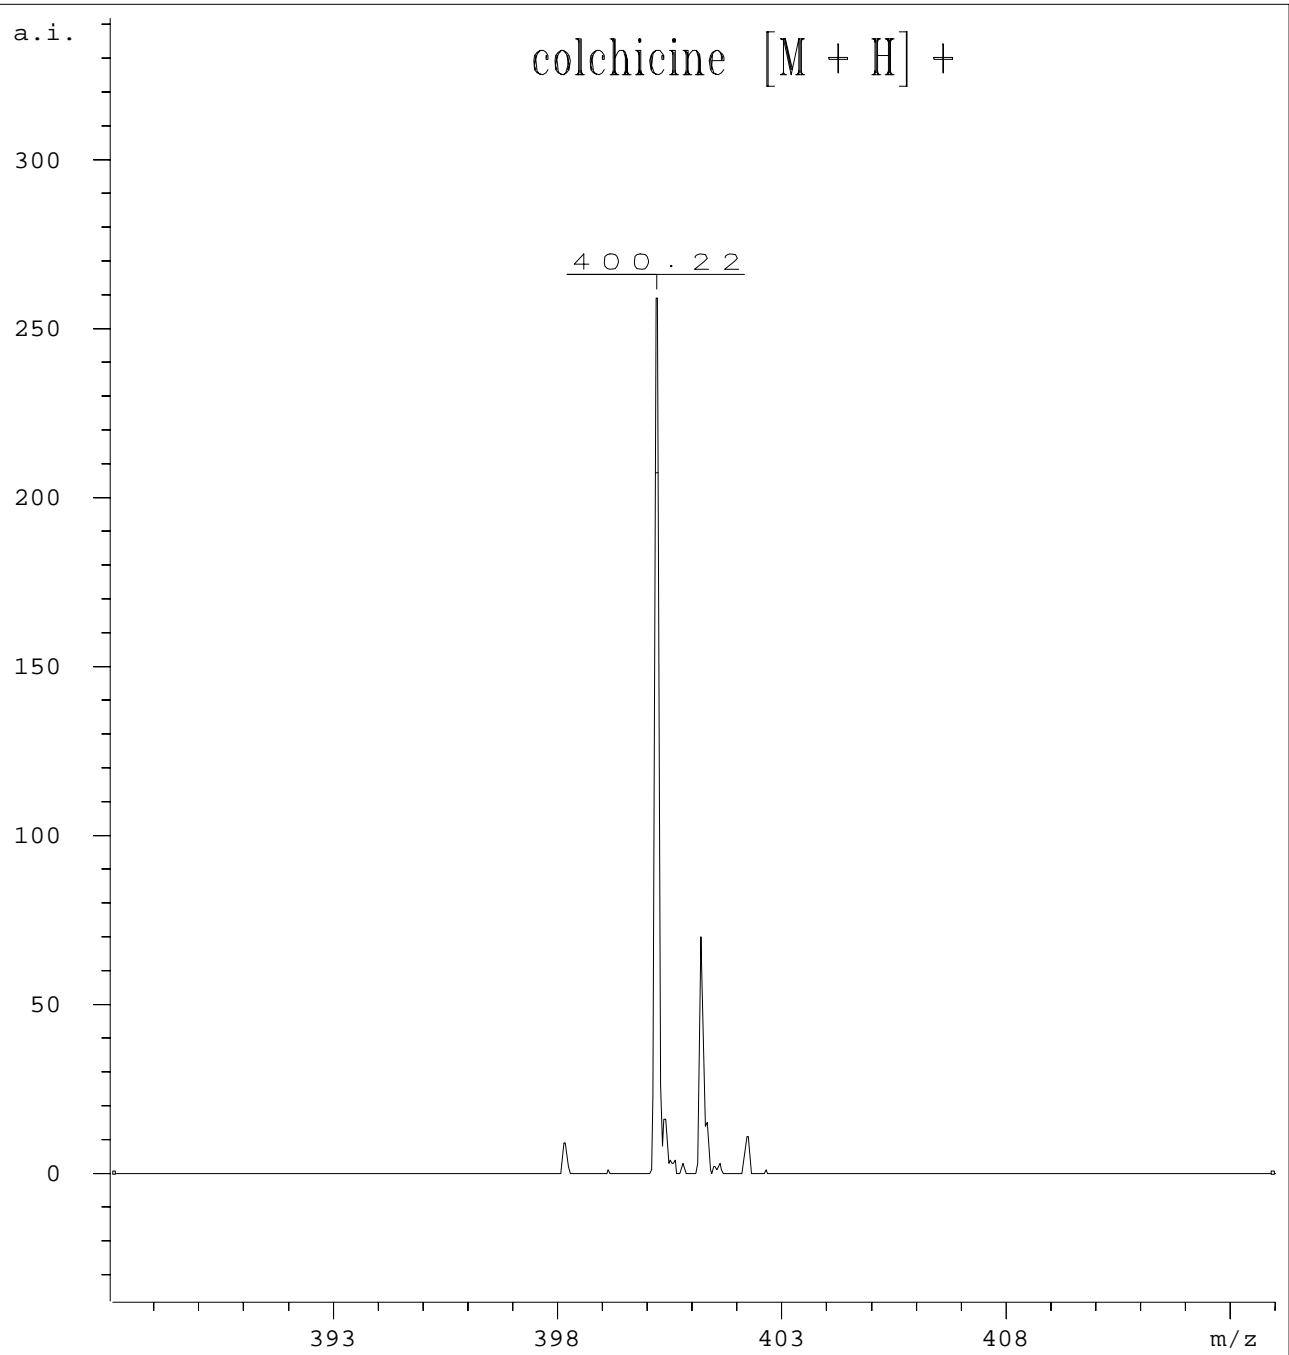

```

INSTRUM OMNIFLEX
OpId tof
SMPNAM 20060517_colchi
AQ_DATE 2006-05-17 13:48:04
PATH D:\data\biol
POLARI POS
AQOP_m Linear
TD 32683
NoSHOTS 60
SMONUM 0
SMOPTS1 0
SMOPTS2 0
SMOPTS3 0
DW 1.00 [ns]
DELAY 11513 [ns]
Uis1 19.00 [kV]
Uis2 13.95 [kV]
Uref1 20.00 [kV]
Ulen 9.20 [kV]
Uhimass 0.00 [kV]
RefFull 0.00 [kV]
UdetL 1.65 [kV]
UdetR 1.70 [kV]
Udefl 0.00 [kV]
REPHZ 5.00 [Hz]
ATTEN 33.0
ML1 786616.393
ML2 238.332
ML3 0.000
HITURBO no
GDEON yes
GDEDLY short
DEFLON no
RLNSBND no
LLNSBND no
UIS2BND no
DPCAL1 0.38
DPMASS 500.00 [Da]
RBNDVAL 0.00
LBNDVAL 0.00
IS2BNDV 0.00
CMT1 FLEXControl generated XMASS data
CMT2 (c) 2000 Bruker Daltonics

```
