# Supplementary material
Source: publisher site journal article supplement (doi:10.3762/bjoc.2.13)

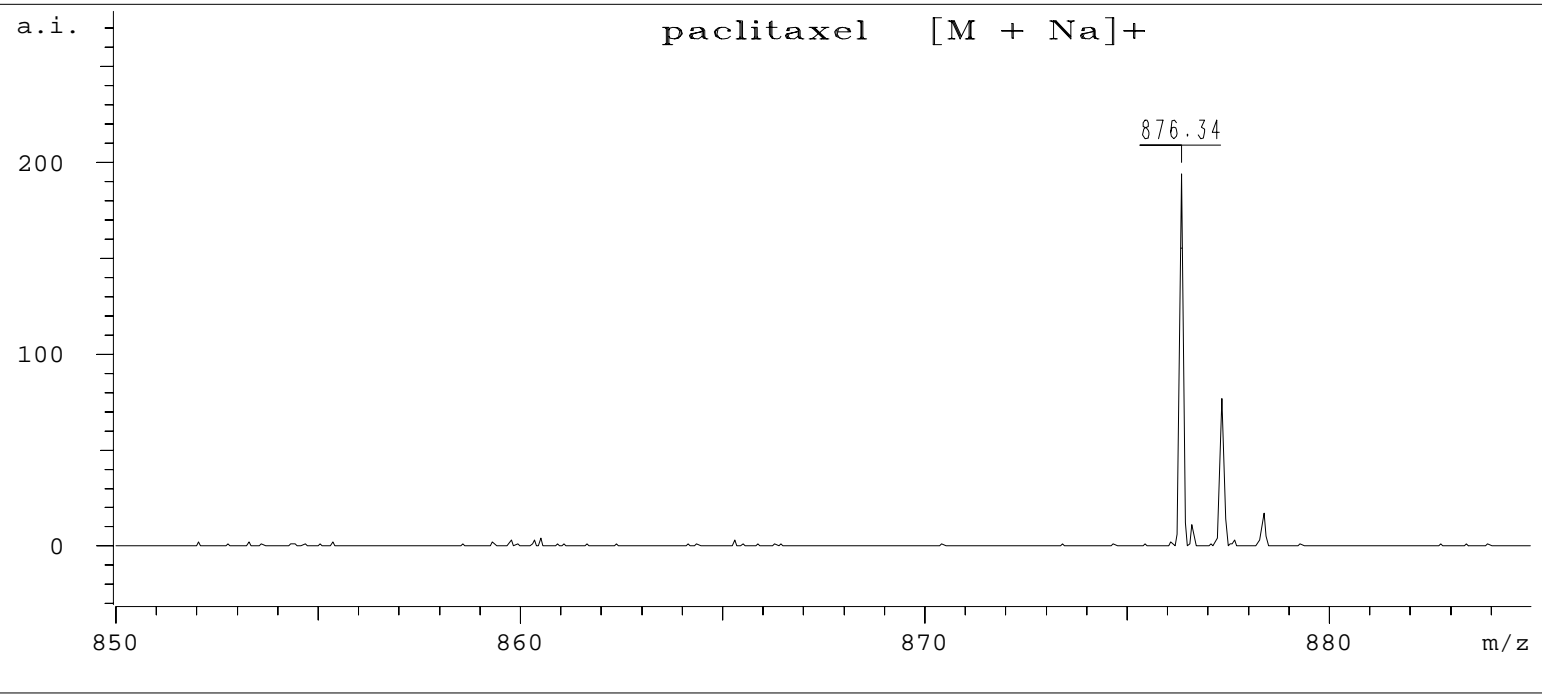

PULPROG  
TD 2048  
NS 16  
DS 0  
SW 20.000 ppm

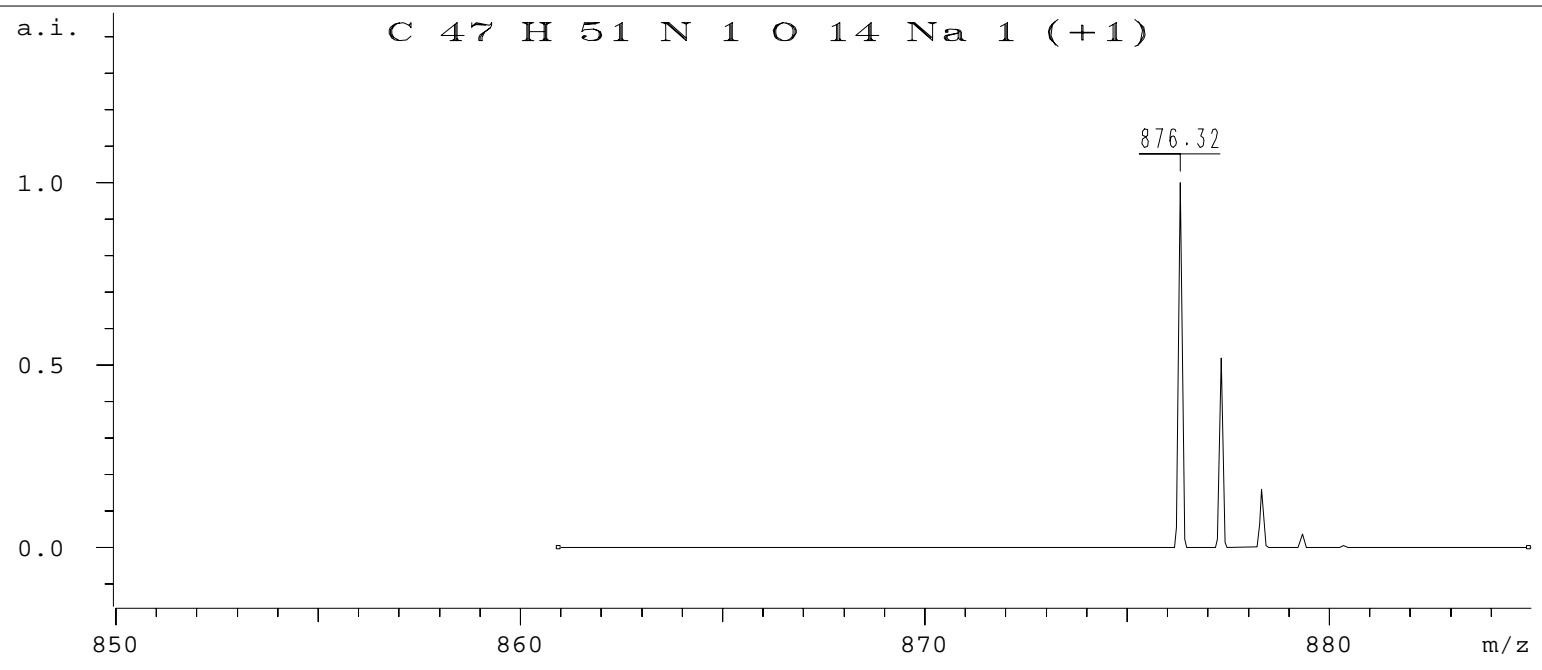

Supplement: Additional file 7 [file 1860-5397-2-13-S7.pdf]
